# Supplementary material for: Copper and Melanin Play a Role in Myxococcus xanthus Predation on Sinorhizobium meliloti
Source: PubMed Central journal article supplement (PMC7010606; doi:10.3389/fmicb.2020.00094), 2020-02-04
Supplement: Image_2.pdf [file Image_2.pdf]

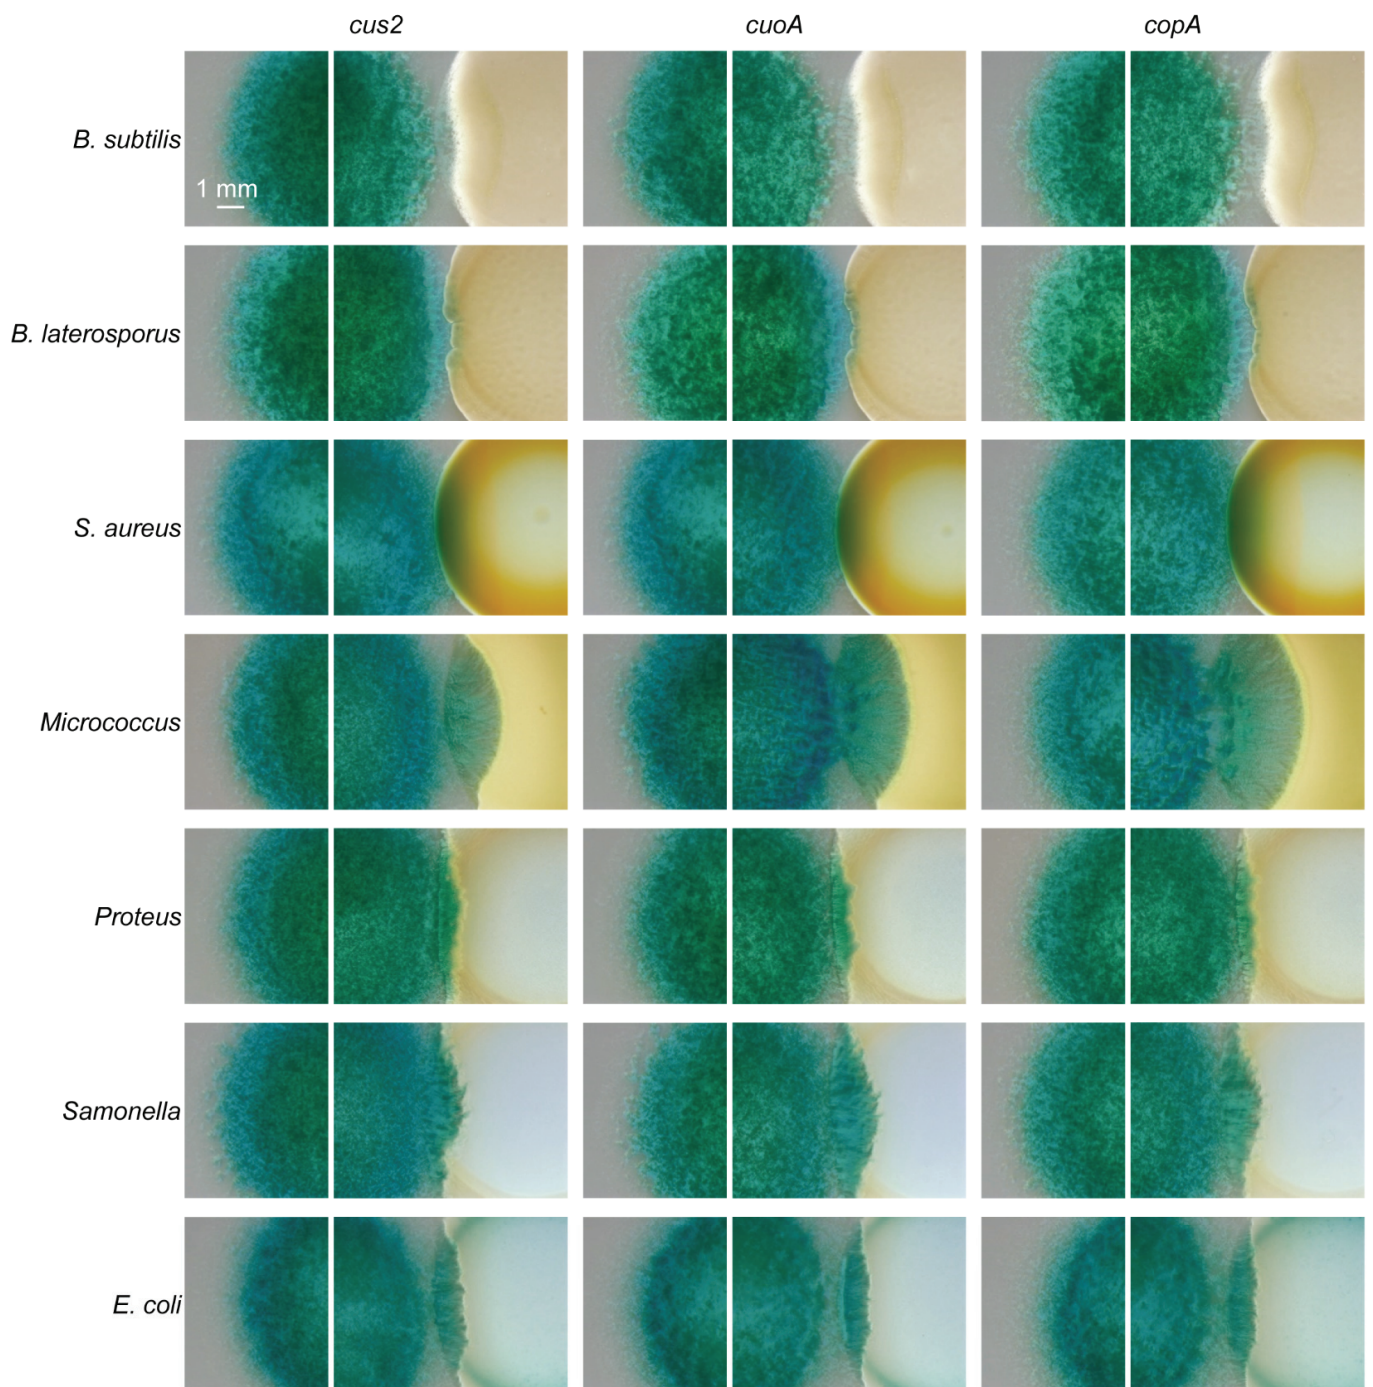

Figure S2. Detection of copper accumulation in the predatory interface of *M. xanthus* and several bacteria. *M. xanthus* strains harboring fusions between genes *cuoA*, *cus2* and *copA*, and *lacZ* were co-cultured with Gram-positive and Gram-negative bacteria in the presence of 300  $\mu\text{M}$  of copper. Strains were spotted onto CTT agar plates containing 100  $\mu\text{g/ml}$  X-gal to visualize the blue color development. Pictures were taken after 48 h of incubation under a dissecting microscope with illumination from the bottom of the colonies.
